# Supplementary material for: Extended-ensemble docking to probe dynamic variation of ligand binding sites during large-scale structural changes of proteins
Source: PubMed Central journal article supplement — Chem Sci. 2022 Mar 16;13(14):4150–69. doi: 10.1039/d2sc00841f (PMC8985516; doi:10.1039/d2sc00841f), 2022-03-16
Supplement: SC-013-D2SC00841F-s001.pdf [file SC-013-D2SC00841F-s001.pdf]

## Supplementary Information

Here we provide more details on the SMD results used for generating the extended ensemble of Pgp.

### Conformational ensemble of Pgp during IF to OF transition

Starting from 20 pre-equilibrated IF structures of Pgp and using the modeled OF structure as the target, SMD simulations were performed using different transition protocols representing mechanistically distinct transition pathways. The RMSD values between the initial IF equilibrated structures indicate the conformational heterogeneity of the starting state used for the SMD simulations (Fig. S5). The comparison of the non-equilibrium work profiles associated with these steered transitions shows a consistent trend for the 4 transition protocols applied. The SMD simulations utilizing protocol P4 ( $\alpha + \text{NBDi} + \text{SB} + \beta$ ) show overall lower non-equilibrium work values compared to the other 3 protocols, for the 20 independent runs conducted for each protocol (Fig. S4A). Furthermore, final structures generated using this protocol show lower RMSD values with respect to the target OF structure compared to other protocols (Fig. S4B). The transition pathway obtained from protocol P4 was thus considered to be the most probable mechanistic pathway connecting the two functional states of Pgp and was further utilized for longer SMD runs.

The longer SMD simulation showed lower overall non-equilibrium work required for the transition compared to the shorter runs (Figs. S4A and S6A). This is expected as longer timescales allow the system to remain closer to its ideal pathway, decreasing dissipation and leading to lower work values. Concurrently, a more linear change in the CVs over time is observed (Fig. S6B and C). With respect to the target OF conformation, the structures of different protein domains (TMDs, NBD1, NBD2) at the end of the SMD simulation showed RMSD values ranging between 3-5 Å (Fig. S7A), and between 2-6 Å for the individual TM helices (Fig. S7B), reiterating the highly flexible nature of Pgp as well as possible differences

between the OF state and the homologous structure used for the construction of the OF model. The ensemble of Pgp structures for subsequent docking calculations was obtained along the transition pathway by selecting 50 snapshots at nearly equal time intervals spanning the conformations sampled in the CV space (Fig. S8).

Table S1: The distance CV parameters used for applying salt-bridge (SB) and NBDi CVs (NBDi comprising ATP and X-loop interactions) during IF-to-OF SMD simulations.

| CV   | Atom-1     |         | Atom-2  |         | Target       |
|------|------------|---------|---------|---------|--------------|
|      | Residue    | Atom    | Residue | Atom    | Distance (Å) |
| SB   | K185       | NZ      | D993    | OD1/OD2 | 2.8          |
| NBDi | G530/G1175 | N       | ATP     | O1G     | 2.76         |
| NBDi | S528/S1173 | OG      | ATP     | O1G     | 2.88         |
| NBDi | S528/S1173 | OG      | ATP     | O3B     | 3.30         |
| NBDi | Q531/Q1176 | OE1     | ATP     | O2'     | 2.80         |
| NBDi | L527/L1172 | CA      | ATP     | C8      | 4.21         |
| NBDi | D163       | OD1/OD2 | K1167   | NZ      | 2.8          |
| NBDi | E522       | OE1/OE2 | T806    | HG1     | 2.8          |

Table S2: Binding pocket size and propensity of ligand binding (PLB) to the extended ensemble of Pgp.

| Structure         | TMD-Apex |     | TMD1 |     | TMD2 |     | TMD-ext* |      | TMD-cyt* |     |
|-------------------|----------|-----|------|-----|------|-----|----------|------|----------|-----|
|                   | Size     | PLB | Size | PLB | Size | PLB | Size     | PLB  | Size     | PLB |
| Crystal structure | 219      | 5.4 | 47   | 0.4 | 84   | 0.6 | -        | -    | -        | -   |
| Snapshot-1        | 187      | 4.7 | 89   | 1.3 | 54   | 1.3 | -        | -    | -        | -   |
| Snapshot-10       | 210      | 3.7 | 76   | 1.1 | 117  | 1.4 | -        | -    | -        | -   |
| Snapshot-20       | 327      | 7.1 | 53   | 0.6 | 154  | 1.9 | -        | -    | -        | -   |
| Snapshot-30       | 473      | 7.8 | 111  | 0.5 | 67   | 0.3 | -        | -    | -        | -   |
| Snapshot-40       | 232      | 4.4 | 94   | 1.4 | 75   | 0.6 | 77       | 0.6  | 144      | 0.6 |
| Snapshot-50       | 249      | 0.7 | -    | -   | -    | -   | 49       | 0.05 | -        | -   |

\* TMD-ext and TMD-cyt represent the binding pockets predicted on the extracellular and cytoplasmic sides of the TMD.

Table S3: Percentage distribution of binding modes of all compounds in different binding clusters and their correspondingly mapped sites in the protein.

| <b>Cluster Number</b> | <b>Mapped Protein site</b> | <b>Percentage</b> |
|-----------------------|----------------------------|-------------------|
| 1                     | E1                         | 0.9               |
| 2                     | E3                         | 0.8               |
| 3                     | E2                         | 6.1               |
| 4                     | M1                         | 50.4              |
| 5                     | M2                         | 27.8              |
| 6                     | R2                         | 2.4               |
| 7                     | R1                         | 3.3               |
| 8                     | S1                         | 2.0               |
| 9                     | S2                         | 0.7               |
| 10                    | H1                         | 2.7               |
| 11                    | M3                         | 2.2               |
| 12                    | H2                         | 0.7               |



Figure S1: **Important structural domains and features of Pgp.** Pgp is shown using a cartoon representation. The multi-domain protein consists of two transmembrane (TMD) domains, TMD1 and TMD2 (blue and pink, respectively), each connected to a nucleotide binding domain, NBD1 and NBD2, respectively (green). A large drug binding pocket (DBP) in the TMD forms a major region for binding of different ligand classes to Pgp.



Figure S2: **Collective variables (CVs) used to induce structural transition of Pgp between the IF and OF states.** The two TMD leaflets/domains (TMD1 and TMD2) are shown in pink and blue, and the NBD domains are shown as green circles. The four system-specific CVs,  $\alpha$  (representing opening/closing of the cytoplasmic side),  $\beta$  (representing opening/closing of the extracellular side), NBDi (contacts between the two NBDs), and SB (salt-bridge distance between K185 and D9993), which were used to steer the conformational transition of the protein, are shown.



Figure S3: **Distances used for clustering of binding modes.** Distances describing each binding mode (yellow star) to the TMDs were calculated with respect to 6 reference points in space. Four fixed points in the (in  $-y$ ,  $+y$ ,  $-z$ , and  $+z$ ) directions; shown as green dots) were selected as the centers of the four faces of the docking grid box around the TMD (green transparent rectangular prism), respectively. These points are the same in all protein conformations used for docking. Two variable points in the  $-x$  and  $+x$  directions (blue dots) were selected as the C- $\alpha$  atoms of first residues of TM1 and TM7 helices, respectively, to represent the large structural change of the protein between the conformations. The distance between the center of mass of the ligand and these 6 points were used for constructing the dissimilarity matrix used in clustering.



Figure S4: **Non-equilibrium work and closeness (RMSD) of the final structure to the target in SMD simulations.** A) The non-equilibrium work values for the 4 applied transition protocols (P1, P2, P3 and P4) used in the SMD simulations to induce transition from the IF to the OF state of Pgp. The work values are shown for 20 independent 30-ns SMD runs for each protocol, each starting from a separate IF structure selected from an equilibrium pool. B) The C $\alpha$  RMSD with respect to the target OF structure for the above SMD runs. The dashed red lines in (A) and (B) represent the means of non-equilibrium work and RMSD, respectively, averaged for the 20 independent runs in each protocol. Overall, P4 showed the lowest work values for the transition, and the lowest RMSD of the final structure to the target.



Figure S5: **Conformational diversity of the starting IF structures used for the SMD simulations.** The plot shows C $\alpha$  RMSD for each of the 20 starting IF structures with respect to the target OF structure. The dashed red line represents the largest RMSD, corresponding to the equilibrated IF structure 20, used as the starting structure employed for the longer SMD run, which in turn used to generate the extended ensemble for docking.



Figure S6: **Evolution of the structure during the SMD transitions.** A) The total non-equilibrium work for the 100-ns SMD run is shown for the most efficient transition protocol (P4), along with the contributions from individual CVs. The longer SMD simulation showed lower overall work values compared to the shorter runs employing the same starting IF structure (Fig. S4). The changes in the CVs comprising B) ATP-NBD and X-loop interactions (NBDi), and C) salt-bridge formation (SB), over the 100-ns SMD simulations are provided. Both these CVs show a linear change over the course of the simulation.



Figure S7: **Structural changes during the SMD simulation.** A) The RMSD values for the whole protein and for the separate domains of Pgp were calculated with respect to the target structure. RMSDs for TMD (TMD1+TMD2), NBD1 and NBD2 were calculated by first superimposing the trajectory using the whole protein backbone and then calculating the RMSD for the individual domains. B) The RMSD values of the individual TMD helices (TM1-TM12) with respect to the final OF structure are shown. These values were calculated by first superimposing the trajectory using the TMD of the protein and then calculating the RMSD for the individual TM helices. Overall, the IF structure reached within  $\sim 4$  Å of the target OF structure.



Figure S8: **Conformations selected for Pgp's extended ensemble.** A) The global conformational changes in Pgp during IF-to-OF transition were characterized in terms of the cytoplasmic opening/closing angle ( $\alpha$ ), extracellular opening/closing angle ( $\beta$ ) and the distance between the centers of masses of the two NBDs. The extended ensemble of Pgp was generated by taking 50 snapshots equally distributed along this conformational space (shown as dots). The  $\alpha/\beta$  angles and NBD-distance values in the target OF structure are shown as dashed lines of similar colors.



Figure S9: **Comparison of binding affinities in multiple docking runs.** The highest predicted binding affinities for 4 representative compounds to each conformation of the extended ensemble of Pgp (0-50) in the main docking set (original) and in 4 additional docking repeats (replicas) are shown. With the employed parameters, Autodock Vina is able to reproduce the highest scoring conformation (energy minima) of the docked binding pose at the employed sampling level.



Figure S10: **Binding affinities to the extended ensemble.** The predicted best binding affinities for all compounds to each of the selected 51 Pgp conformations (0-50) are shown. The 0<sup>th</sup> conformation represents the starting crystal structure in the IF state used in generating the transition pathway.



Figure S11: **Clustering Dendrogram.** Hierarchical tree or dendrogram generated using average linkage clustering of the binding modes for all docked compounds is shown. The cutoff distance (15 Å) selected for clustering the dendrogram is shown as a dashed black line. All tree nodes lying below the cutoff distance represent a separate cluster shown in a different color. The respective binding populations of the clusters are provided in Table S3, and the mapped binding sites on Pgp structure represented by these clusters are shown in Figs. 6 and S12. Clusters 4 and 5 together constituted 78% of all predicted binding modes.



Figure S12: **Clustering of binding modes generated from extended-ensemble docking.** Clusters of the binding modes are overlaid onto a representative (IF) conformation of Pgp. Each binding cluster is shown in a different color with heavy atoms of the bound ligand shown as points. The density of the points in each cluster represents the cluster population. The corresponding binding subsites in the protein are indicated in the legend at the bottom.



Figure S13: **Cluster binding energies.** The binding affinities of members (binding modes) of each cluster are shown as a swarm plot for different compounds. The snapshots belonging to different protein conformations are shown in different colors (defined in legend). Additionally, a boxplot providing the median cluster values, Q1 and Q3 quartiles, as well as minimum ( $Q1 - 1.5 \times \text{interquartile range}$ ) and maximum ( $Q3 + 1.5 \times \text{interquartile range}$ ) binding affinity values, is overlaid on top of the swarm plot for each cluster.



Figure S14: **Interaction frequency of binding residues.** The normalized interaction frequencies of the binding residues for all binding modes of different compounds docked to the extended-ensemble of Pgp are shown. The residues are considered to interact with the docked compound if their heavy atoms are within 4 Å.
